# Supplementary material
Source: MDPI journal article supplement (https://www.mdpi.com/search?q=polymers-12-01291)
Supplement: s001 [file polymers-12-01291-s001.pdf]

Supplementary

# Ultra-High Through-Cure of (Meth)Acrylate Copolymers via Photofrontal Polymerization

Catharina Ebner <sup>1</sup>, Julia Mitterer <sup>1</sup>, Paul Eigruber <sup>1</sup>, Sebastian Stieger <sup>2</sup>, Gisbert Riess <sup>1,\*</sup> and Wolfgang Kern <sup>1</sup>

<sup>1</sup> Department of Polymer Engineering and Science, Chair in Chemistry of Polymeric Materials, Montanuniversitaet Leoben, 8700 Leoben, Austria; catharina.ebner@unileoben.ac.at (C.E.); julia.mitterer@unileoben.ac.at (J.M.); paul.eigruber@unileoben.ac.at (P.E.); wolfgang.kern@unileoben.ac.at (W.K.)

<sup>2</sup> Department of Polymer Engineering and Science, Chair of Injection Moulding of Polymers, Montanuniversitaet Leoben, 8700 Leoben, Austria; sebastian.stieger@unileoben.ac.at

\* Correspondence: gisbert.riess@unileoben.ac.at; Tel.: +43-3842-402-2301

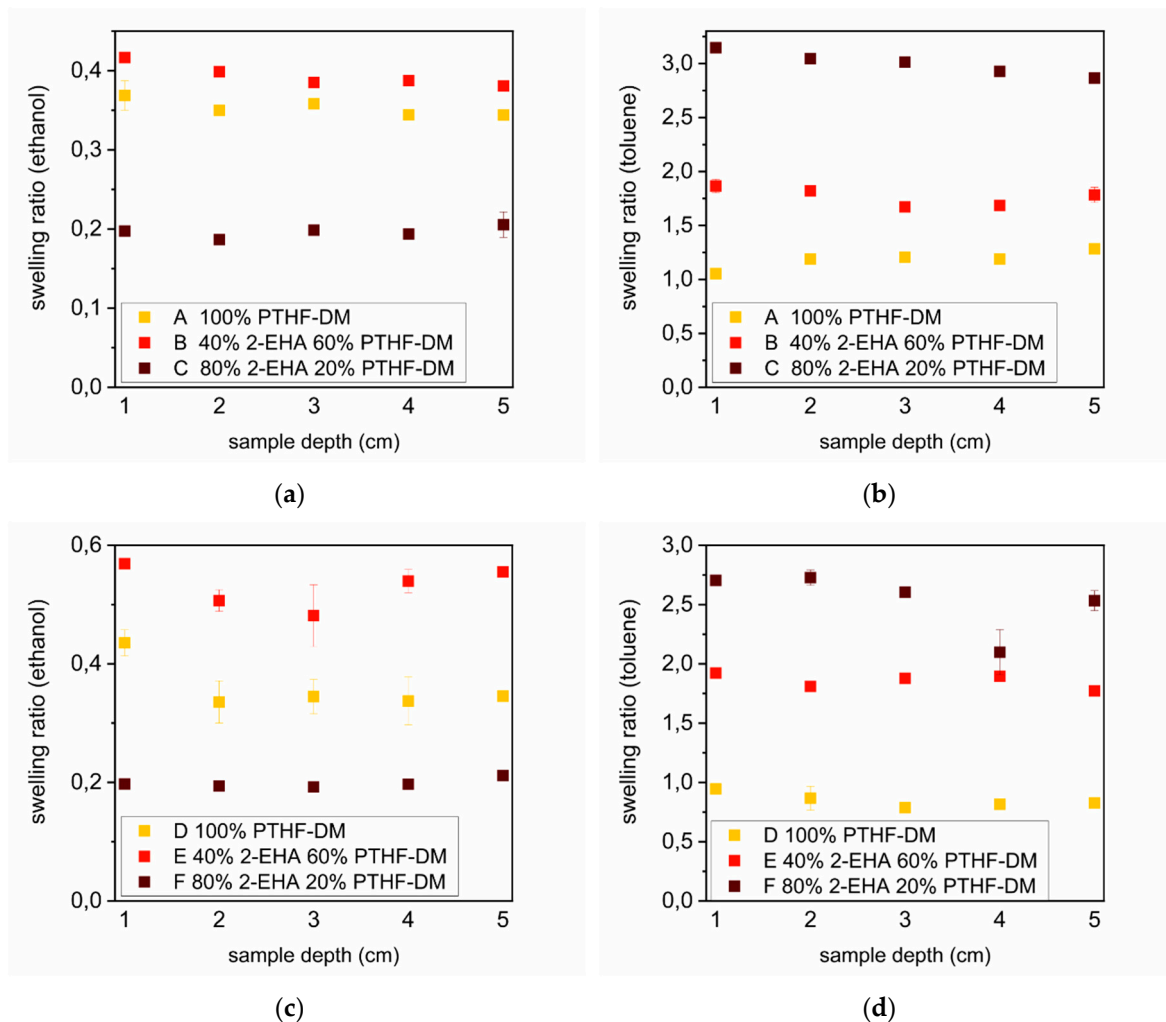

Figure S1. a–d: Swelling ratios of specimens derived from PBS A–F in ethanol and toluene .
